# Supplementary material for: Multifaceted Sn–Sn bonding in the solid state. Synthesis and structural characterization of four new Ca–Li–Sn compounds
Source: Royal Society of Chemistry journal article supplement (doi:10.1039/c9dt02803j), 2019-01-01
Supplement: c9dt02803j1.pdf [file c9dt02803j1.pdf]

Supporting Information

---

**Multifaceted Sn–Sn bonding in the solid state. Synthesis and structural characterization of four new Ca–Li–Sn compounds**

Alexander Ovchinnikov,<sup>a,b</sup> and Svilen Bobev<sup>a</sup>

<sup>a</sup> Department of Chemistry and Biochemistry, University of Delaware,

Newark, Delaware 19716, USA

<sup>b</sup> Department of Materials and Environmental Chemistry, Stockholm University, Stockholm

10691, Sweden

**Contents:**

- 1. Powder X-ray diffraction (PXRD)**
- 2. Local coordination of Li**
- 3. DOS plot for Ca<sub>9</sub>LiMgSn<sub>10</sub>**
- 4. Selected interatomic distances**

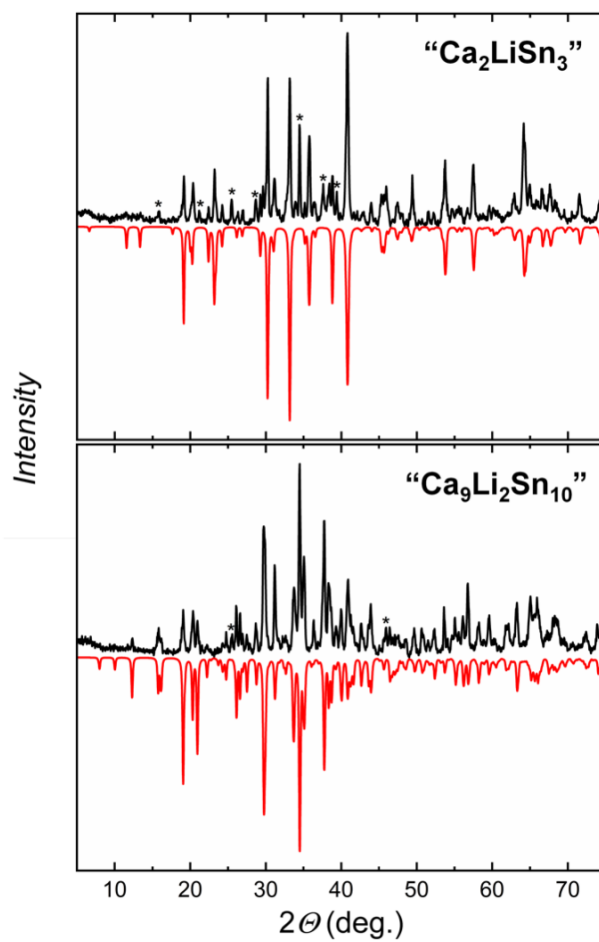

Fig. S1 PXRD patterns of the samples with nominal compositions  $\text{Ca}_2\text{LiSn}_3$  (top) and  $\text{Ca}_9\text{Li}_2\text{Sn}_{10}$  (bottom). Experimental patterns are shown in black. Theoretical simulations based on the refined crystal structures of  $\text{Ca}_2\text{LiSn}_3$  and  $\text{Ca}_{9-x}\text{Li}_2\text{Sn}_{10}$  ( $x \approx 0.16$ ), respectively, are shown in red. Bragg peak positions of the most intense impurity reflections are marked with asterisks.

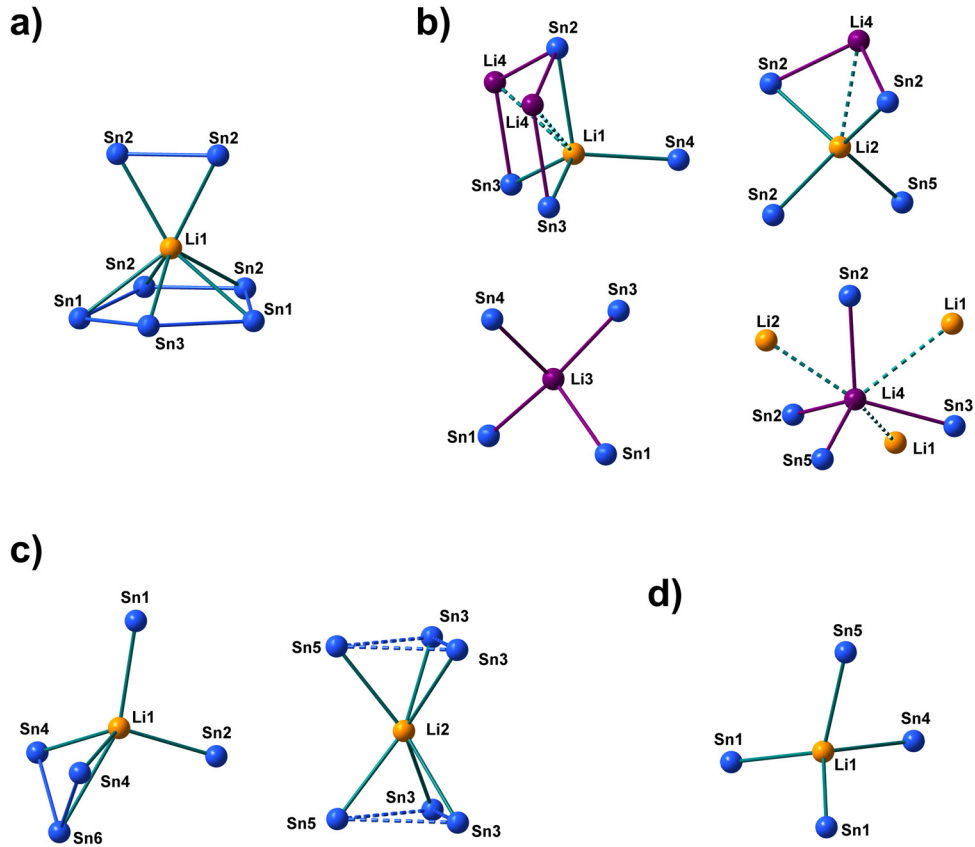

Fig. S2 Local coordination of the Li atoms in the structures of  $\text{Ca}_4\text{LiSn}_6$  (a),  $\text{Ca}_9\text{Li}_{6+x}\text{Sn}_{13-x}$  ( $x \approx 0.28$ ) (b),  $\text{Ca}_2\text{LiSn}_3$  (c), and  $\text{Ca}_{9-x}\text{Li}_2\text{Sn}_{10}$  ( $x \approx 0.16$ ) (d). Li, Sn, and mixed Li/Sn sites are shown in orange, blue, and purple, respectively.

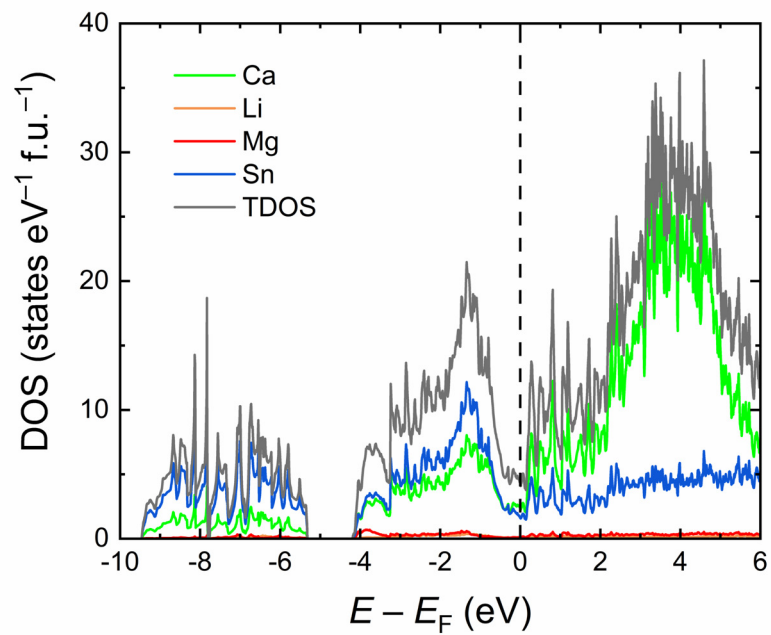

Fig. S3 Total and projected electronic densities of states (DOS) for the hypothetical compound  $\text{Ca}_9\text{LiMgSn}_{10}$ .

Table S1 Selected interatomic distances (Å) for Ca<sub>4</sub>LiSn<sub>6</sub>

| Atoms        | Distance  | Atoms        | Distance  |
|--------------|-----------|--------------|-----------|
| Ca1 —Sn4     | 3.1598(8) | Ca3 —Sn2 × 2 | 3.1678(3) |
| —Sn1         | 3.2380(8) | —Sn4         | 3.224(1)  |
| —Sn2         | 3.2435(7) | —Sn2 × 2     | 3.3133(3) |
| —Sn3         | 3.3189(8) | —Sn1 × 2     | 3.3515(7) |
| —Sn3         | 3.3620(8) | —Sn1 × 2     | 3.5648(6) |
| —Sn1         | 3.4329(8) | Li1 —Sn2 × 2 | 2.891(8)  |
| —Sn4         | 3.5139(8) | —Sn2 × 2     | 2.895(8)  |
| —Sn1         | 3.6310(7) | —Sn3         | 2.899(9)  |
| Ca2 —Sn1 × 2 | 3.3641(8) | —Sn1 × 2     | 3.096(6)  |
| —Sn2 × 2     | 3.376(1)  | Sn1 —Sn2     | 2.9346(3) |
| —Sn3         | 3.385(1)  | —Sn3         | 2.9633(3) |
| —Sn3         | 3.392(1)  | —Sn4         | 2.9981(3) |
| —Sn2 × 2     | 3.569(1)  | Sn2 —Sn2     | 2.7971(5) |
| —Sn4 × 2     | 3.8952(4) | —Sn1         | 2.9347(3) |
|              |           | Sn3 —Sn1 × 2 | 2.9634(3) |
|              |           | Sn4 —Sn1 × 2 | 2.9982(3) |

Table S2 Selected interatomic distances (Å) for Ca<sub>9</sub>Li<sub>6+x</sub>Sn<sub>13-x</sub> (x ≈ 0.28)

| Atoms         | Distance | Atoms         | Distance |
|---------------|----------|---------------|----------|
| Ca1 —Sn1      | 3.196(2) | Li1 —Sn3 × 2  | 2.82(1)  |
| —Sn4 × 2      | 3.212(2) | —Sn4          | 2.87(2)  |
| —Sn3          | 3.245(2) | —Sn2          | 2.89(2)  |
| —Sn6 × 2      | 3.369(2) | —(Li/Sn)4 × 2 | 3.28(1)  |
| —Sn1          | 3.498(2) | Li2 —Sn2 × 2  | 2.78(1)  |
| —(Li/Sn)3 × 2 | 3.825(2) | —Sn5          | 2.84(2)  |
| Ca2 —Sn5 × 2  | 3.311(2) | —(Li/Sn)4     | 2.88(2)  |

|     |               |           |          |               |           |
|-----|---------------|-----------|----------|---------------|-----------|
|     | —Sn3 × 2      | 3.331(2)  |          | —Sn2          | 2.90(2)   |
|     | —(Li/Sn)4 × 2 | 3.339(2)  | (Li/Sn)3 | —Sn3          | 2.862(2)  |
|     | —Sn4 × 2      | 3.342(2)  |          | —Sn4          | 2.877(2)  |
|     | —(Li/Sn)3 × 2 | 3.373(2)  |          | —Sn1 × 2      | 2.9036(9) |
| Ca3 | —Sn1          | 3.168(2)  | (Li/Sn)4 | —Sn5          | 2.797(2)  |
|     | —Sn3 × 2      | 3.228(2)  |          | —Sn3          | 2.806(2)  |
|     | —Sn1 × 2      | 3.235(2)  |          | —Sn2 × 2      | 2.853(1)  |
|     | —Sn6          | 3.605(2)  | Sn1      | —(Li/Sn)3 × 2 | 2.9036(9) |
|     | —(Li/Sn)3 × 2 | 3.632(2)  |          | —Sn6 × 2      | 3.2390(6) |
|     | —(Li/Sn)3     | 3.748(2)  | Sn2      | —(Li/Sn)4 × 2 | 2.853(1)  |
| Ca4 | —Sn5 × 2      | 3.323(2)  | Sn3      | —(Li/Sn)4     | 2.806(2)  |
|     | —Sn4 × 2      | 3.337(2)  |          | —(Li/Sn)3     | 2.862(2)  |
|     | —Sn2 × 2      | 3.371(2)  | Sn4      | —Sn5          | 2.865(1)  |
|     | —(Li/Sn)4     | 3.480(3)  |          | —(Li/Sn)3     | 2.877(2)  |
|     | —Sn2          | 3.815(2)  | Sn5      | —(Li/Sn)4     | 2.797(2)  |
| Ca5 | —Sn5 × 4      | 3.2296(6) |          | —Sn4          | 2.865(1)  |
|     | —Sn2 × 2      | 3.4188(8) | Sn6      | —Sn1 × 4      | 3.2390(6) |
|     | —(Li/Sn)4 × 4 | 3.945(2)  |          |               |           |

Table S3 Selected interatomic distances (Å) for Ca<sub>2</sub>LiSn<sub>3</sub>

| Atoms | Distance          | Atoms | Distance          |
|-------|-------------------|-------|-------------------|
| Ca1   | —Sn2 × 2 3.239(3) | Li2   | —Sn5 × 2 2.99(6)  |
|       | —Sn4 3.276(5)     |       | —Sn3 × 4 3.03(3)  |
|       | —Sn1 × 2 3.294(3) | Sn1   | —Sn6 2.986(2)     |
|       | —Sn3 × 2 3.421(3) |       | —Sn3 3.028(2)     |
|       | —Sn6 × 2 3.655(3) | Sn2   | —Sn5 2.951(2)     |
| Ca2   | —Sn2 × 2 3.257(3) |       | —Sn3 2.971(3)     |
|       | —Sn1 × 2 3.278(3) | Sn3   | —Sn2 2.971(3)     |
|       | —Sn3 × 2 3.578(4) |       | —Sn1 3.028(2)     |
|       | —Sn5 × 2 3.595(4) |       | —Sn3 3.287(3)     |
| Ca3   | —Sn2 × 4 3.357(2) |       | —Sn5 3.363(3)     |
|       | —Sn5 × 2 3.439(5) | Sn4   | —Sn6 × 2 2.974(3) |

|     |          |          |     |          |          |
|-----|----------|----------|-----|----------|----------|
|     | —Sn3 × 4 | 3.582(5) | Sn5 | —Sn2 × 2 | 2.951(2) |
| Ca4 | —Sn4     | 3.195(9) |     | —Sn3 × 2 | 3.363(3) |
|     | —Sn1 × 4 | 3.219(2) | Sn6 | —Sn4 × 2 | 2.974(3) |
|     | —Sn6 × 2 | 3.481(5) |     | —Sn1 × 2 | 2.986(2) |
| Li1 | —Sn2     | 2.82(5)  |     |          |          |
|     | —Sn1     | 2.9(1)   |     |          |          |
|     | —Sn4 × 2 | 3.01(4)  |     |          |          |
|     | —Sn6     | 3.25(9)  |     |          |          |

---

Table S4 Selected interatomic distances (Å) for  $\text{Ca}_{9-x}\text{Li}_2\text{Sn}_{10}$  ( $x \approx 0.16$ )

| Atoms | Distance | Atoms     | Distance |          |           |
|-------|----------|-----------|----------|----------|-----------|
| Ca1   | —Sn1     | 3.2113(8) | Ca5      | —Sn4 × 4 | 3.3381(3) |
|       | —Sn3 × 2 | 3.2683(6) |          | —Sn5 × 4 | 3.4356(3) |
|       | —Sn4 × 2 | 3.2888(6) | Li1      | —Sn5     | 2.852(7)  |
|       | —Sn3 × 2 | 3.4874(6) |          | —Sn4     | 2.883(6)  |
| Ca2   | —Sn3 × 2 | 3.2546(6) |          | —Sn1 × 2 | 2.909(4)  |
|       | —Sn2 × 2 | 3.2703(6) | Sn1      | —Sn2     | 2.9160(4) |
|       | —Sn5 × 2 | 3.3680(6) | Sn2      | —Sn1     | 2.9160(4) |
|       | —Sn4 × 2 | 3.4207(6) |          | —Sn5     | 2.9437(4) |
| Ca3   | —Sn1     | 3.2699(8) | Sn3      | —Sn3     | 2.8823(5) |
|       | —Sn5 × 2 | 3.3011(6) |          | —Sn4     | 2.9247(4) |
|       | —Sn1 × 2 | 3.3449(6) | Sn4      | —Sn5     | 2.9198(4) |
|       | —Sn2 × 2 | 3.5068(6) |          | —Sn3     | 2.9246(4) |
| Ca4   | —Sn3     | 3.2427(8) | Sn5      | —Sn4     | 2.9198(4) |
|       | —Sn2 × 2 | 3.2873(6) |          | —Sn2     | 2.9437(4) |
|       | —Sn2     | 3.3008(9) |          |          |           |
|       | —Sn1 × 2 | 3.3624(6) |          |          |           |

---
